# Supplementary material
Source: MDPI journal article supplement (https://www.mdpi.com/2673-7248/3/2/12)
Supplement: s1 [file s1]

## SUPPLEMENTARY MATERIAL

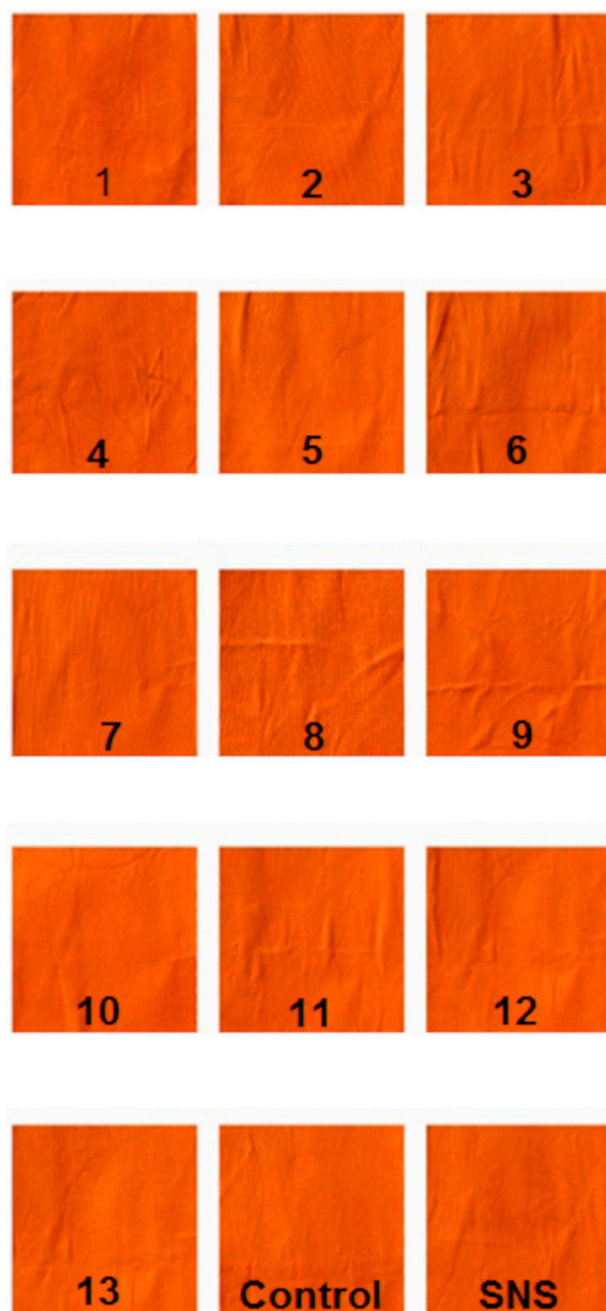

**Figure S1.** Photos of the fabric samples from treatments at 130°C.

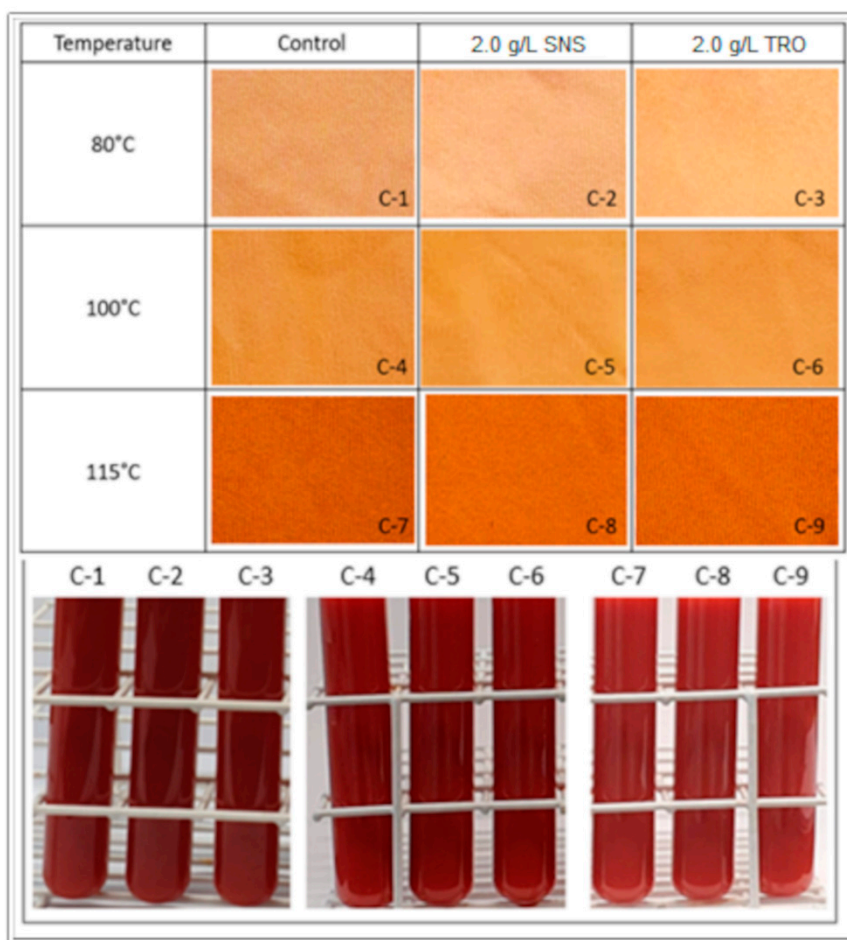

**Figure S2.** Fabrics and residual dyeing solutions at 80°C, 100°C and 115°C.

| Treatment                      | CO<br>Witness Migration                                                             | PES<br>Witness Migration                                                             |
|--------------------------------|-------------------------------------------------------------------------------------|--------------------------------------------------------------------------------------|
| Blank Proof Dyeing<br>Dye Only |  |  |
| Dyeing with<br>2.0 g/L SNS     |  |  |
| Dyeing with<br>2.0 g/L TRO     |  |  |

**Figure S3.** Samples of cotton and polyester after wet rubbing fastness test.

| Testing                  | Blank<br>Proof Dyeing                                                              | Standard<br>Dyeing with<br>2.0 g/L SNS                                             | Test Dyeing<br>with 2.0 g/L<br>TRO                                                   |
|--------------------------|------------------------------------------------------------------------------------|------------------------------------------------------------------------------------|--------------------------------------------------------------------------------------|
| CO<br>Witness Migration  |   |   |   |
| PES<br>Witness Migration |   |   |   |
| Alteration               |  |  |  |

**Figure S4.** Fabric samples after the washing fastness.

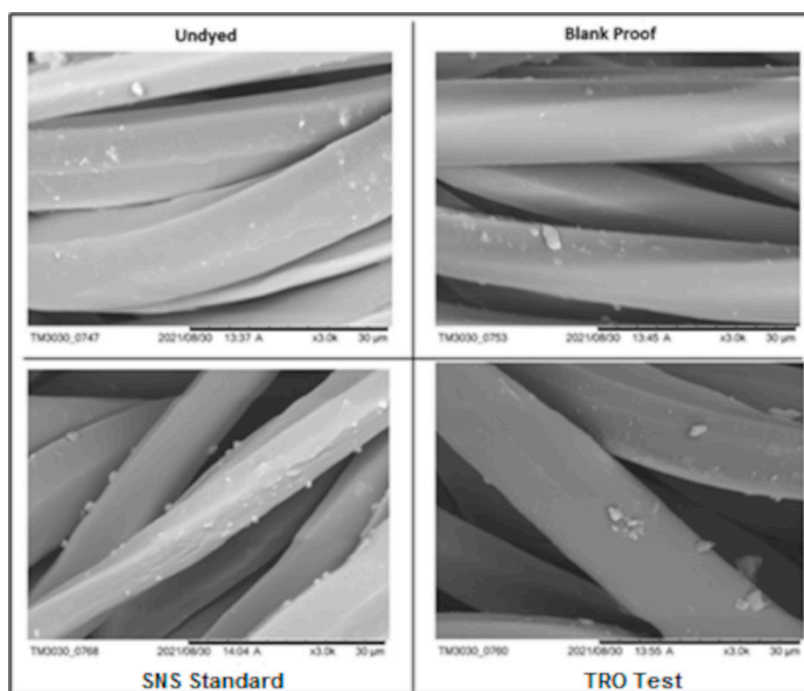

**Figure S5.** SEM images of samples at 3000X magnification.
